# Supplementary material
Source: PubMed Central journal article supplement (PMC3754599)
Supplement: JB.00202-13_zjb999092745so1.pdf [file JB.00202-13_zjb999092745so1.pdf]

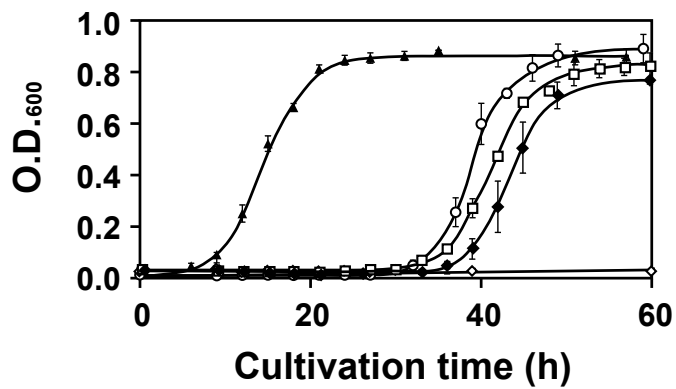

Kanemaru, Y., Hasebe, F., et al., Supplementary Figure S1.

**Effect of deletion of TTC00795 and/or TTC0806 on growth in MM medium containing 500  $\mu$ M AEC.** Open diamond, wild type; open circle,  $\Delta$ TTC0807 mutant; open square,  $\Delta$ TTC0795 mutant; closed diamond,  $\Delta$ TTC0806 mutant; closed triangle,  $\Delta$ TTC0807/ $\Delta$ TTC0969 double mutant.

**A**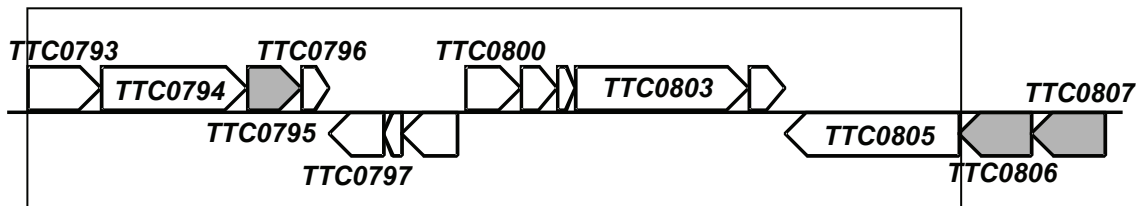**B**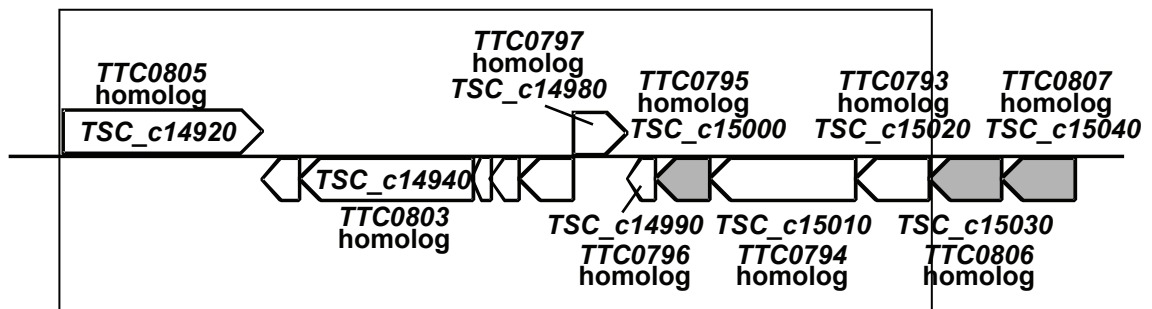**C**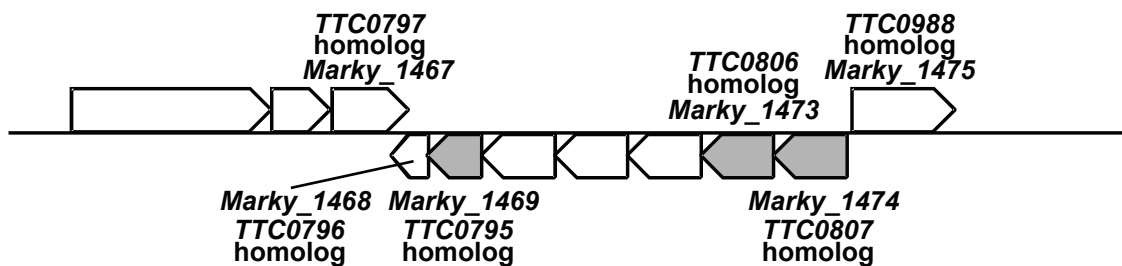

Kanemaru, Y., Hasebe, F., et al., Supplementary Figure S2.

**Gene arrangement of components for AecT-I.** (A) *T. thermophilus* HB27. (B) *T. scotoductus* SA-01. (C) *M. hydrothermalis* (T1<sup>T</sup>). Genes, *TTC0795*, *TTC0806*, and *TTC0807*, and their putative orthologs are shown in gray. Genome region where putative gene inversion had occurred in *T. thermophilus* and the corresponding region of *T. scotoductus* are boxed.

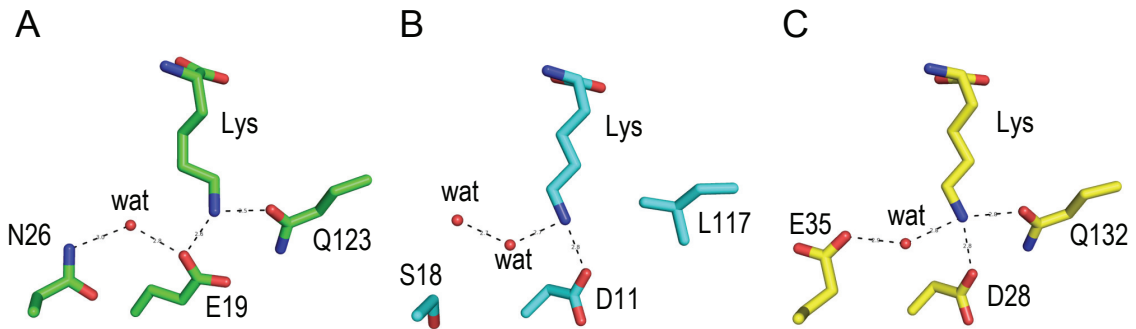

**Kanemaru, Y., Hasebe, F., et al., Supplementary Figure S3.**

**Recognition of  $\epsilon$ -amino group of lysine.** (A) TTC0807. (B) StLAO-BP. (C) GsArtJ. Water molecules closed to the  $\epsilon$ -amino groups are shown as wats.

**Supplementary Table S1. Primer sequences used for construction of expression plasmids for *TTC0795* and *TTC0969***

---

| Name             | Sequence                                                                                      |
|------------------|-----------------------------------------------------------------------------------------------|
| 0795-fw          | 5'-AACTGCAGTAAGAAGGAGATATACATATGGCAAGCTGGAGCCACCCGCAGTTCGAAAAGGGTGGTATGGAGCCCATCATCCGGATC -3' |
| 0795-rv.2        | 5'- AAGGAAAAAAGCGGCCGCTTAGTGGTGGAGCACCTCTG -3'                                                |
| 0969-cpx-fw      | 5'-CCATCGATTAAGAAGGAGATATACATATGAGGGTCCTCGAGGTC -3'                                           |
| h0969-rv-HindIII | 5'-CCCAAGCTTTAATGGTGATGGTGGTGTGCGGCACCTCCCGCGGC -3'                                           |

---

**Supplementary Table S2. Primer sequences for constructs used for gene disruption**

| Name               | Sequence                                        |
|--------------------|-------------------------------------------------|
| ttc0807-up-fw      | 5'- GCTCTAGACTCAACCTCAGCGTCTTGGAC -3'           |
| ttc0807-up-rv      | 5'- GGACTAGTGCTTCACCTCCTAAAGAACCC -3'           |
| htk-fw             | 5'- GGACTAGTCGTTGACGGCGGATATGGTAC -3'           |
| htk-rv             | 5'- CGGGATCCCCGTAACCAACATGATTAACAA -3'          |
| ttc0807-down-fw    | 5'- CGGGATCCAGAAGTGGTTCGGGGAGGACG -3'           |
| ttc0807-down-rv    | 5'- CCGCTCGAG CATGGTGTCCGCGGCGGAAAA -3'         |
| ttc0807-up-rv-hm   | 5'- CCAAGCTTGCTTCACCTCCTAAAGAACCC -3'           |
| hyg-p31-fw         | 5'- CCAAGCTTATTCGGCCCAAGGTTTACAAAATCC -3'       |
| hyg-rv             | 5'- CCATCGATGCCGGGGCGTCAGGCGCCG -3'             |
| ttc0807-down-fw-hm | 5'- CCATCGATAGAAGTGGTTCGGGGAGGACG -3'           |
| ttc0969-up-fw      | 5'- GGACTAGTCCTGGGCCTCGGCGAGGTGGT -3'           |
| ttc0969-up-rv      | 5'- CCAAGCTTTCATGCCTCCTCCTCCAGCTC -3'           |
| ttc0969-down-fw    | 5'- CCATCGATACTACGGCTCCAAGATCGCCG -3'           |
| ttc0969-down-rv    | 5'- GGGGTACCGAGGGCGAGGCGGGCGTTCTG -3'           |
| ttc0806-up-fw      | 5'- AAGGAAAAAAGCGGCCGCGAGGTGGACCTGGGCAACGCC -3' |
| ttc0806-up-rv      | 5'- GGTCTAGAAGAAGGAAGAGGGCGAAAAAG -3'           |
| htk2-fw            | 5'- GGTCTAGACGTTGACGGCGGATATGGTAC -3'           |
| htk2-rv            | 5'- GGACTAGTCGTAACCAACATGATTAACAA -3'           |
| ttc0806-down-fw    | 5'- GGACTAGTAGTGCCCCACCTGCGGCGAAA -3'           |
| ttc0806-down-rv    | 5'- CCAAGCTTGACGGTGGCGATCGCTATGAA -3'           |
| ttc0806-up-rv-hm   | 5'- CCAAGCTTAGAAGGAAGAGGGCGAAAAAG -3'           |
| ttc0806-down-fw-hm | 5'- CCATCGATAGTGCCCCACCTGCGGCGAAA -3'           |
| ttc0806-down-rv-hm | 5'- ACGCGTCGACGACGGTGGCGATCGCTATGAA -3'         |
| ttc0795-up-fw      | 5'- GCTCTAGATTCCGGCTCCTCGAGGGGGGA -3'           |
| ttc0795-up-rv      | 5'- GGACTAGTCGAGGCCCAAAGGTCGGTGG -3'            |
| ttc0795-down-fw    | 5'- CGGGATCCCCCAAGGAGGAGCGCACCCGA -3'           |
| ttc0795-down-rv    | 5'- GGGGTACCAAGGAACCGCCAGGACGGCC -3'            |
| ttc0966-up-fw      | 5'- GGAATTCTCTATGACCCCAACGCCGAGT -3'            |
| ttc0966-up-rv      | 5'- AACTGCAGACCTCACCTCCGAACGCTACG -3'           |
| htk3-fw            | 5'- AACTGCAGCGTTGACGGCGGATATGGTAC -3'           |
| htk3-rv            | 5'- GGTCTAGACGTAACCAACATGATTAACAA -3'           |
| ttc0966-down-fw    | 5'- GCTCTAGATTGAGGTGGCGGCGCCGACAG -3'           |
| ttc0966-down-rv    | 5'- AAGGAAAAAAGCGGCCCGCCCGTGGTGAGGTCCTGGGC -3'  |
| ttc0806 check-fw   | 5'- ATAGACACCTGGATCACCGAC -3'                   |
| ttc0806 check-rv   | 5'- AAGGGGTTCTTCGCCCACTTC -3'                   |
| ttc0807check-fw    | 5'- TGTATAATCTTCCGGGTTCTTTA -3'                 |
| ttc0807check-rv    | 5'- CTTGCAGCGGACGTCCTCCCGAA -3'                 |
| ttc0969check-fw    | 5'- TATCCTCATCTTGATGATGATCTA -3'                |
| ttc0969check-rv    | 5'- TGCCTTCGGCGATCTTGGAGCCGT -4'                |
| ttc0795check-fw    | 5'- CGCCTTCACCCTCGTGGTCCCGG -3'                 |
| ttc0795check-rv    | 5'- TTAGTGGTGGAGCACCTCTGGAG -3'                 |
| ttc0966check-fw    | 5'- AGGCGTTGACAAGACGCCAG -3'                    |
| ttc0966check-rv    | 5'- GGCTCCAAAAGGAGCCACCCC -3'                   |

### Supplementary Table S3. Primer sequences for constructs used for pull-down assay

---

| Name          | Sequence                                                                                     |
|---------------|----------------------------------------------------------------------------------------------|
| 0806-fw-pHis8 | 5'-CGGAATCCGGTACCTCCGCTTTTTC-3'                                                              |
| 0806-rv-pHis8 | 5'-CCCAAGCTTTTAGCGGCCGGGCAGGGCGAG-3'                                                         |
| 0807-pET-fw   | 5'-GCTCTAGACATATGCAGGTGCGGAGCTTTGAGGAGATC-3'                                                 |
| 0807-rv-Flag  | 5'-AAGGAAAAAAGCGGCCGCTTACTTATCGTCATCGTCCTTGTAGTCACCACCCTTGCAGCGGACGTCCTC-3'                  |
| 0795-fw-Strep | 5'-AACTGCAGTAAGAAGGAGATATACATATGGCAAGCTGGAGCCACCCGCAGTTCGAAAAGGGTGGTATGGAGCCCATCATCCGGATC-3' |
| 0795-rv.2     | 5'-AAGGAAAAAAGCGGCCGCTTAGTGGTG GAGCACCTCTG-3'                                                |

---

**Supplementary Table S4. Primer sequences for constructing pHIS8-0807 for crystallization of TTC0807**

---

| Name          | Sequence                               |
|---------------|----------------------------------------|
| pHIS8-0807-fw | 5'-CGGAATTCCAGGTGCGGAGCTTTGAGGAGATC-3' |
| pHIS8-0807-rv | 5'-CCCAAGCTTTCACCTTGCAGCGGACGTCCTC-3'  |

---
